# Supplementary material for: The Transposition of Insertion Sequences in Sigma-Factor- and LysR-Deficient Mutants of Deinococcus geothermalis
Source: MDPI journal article supplement (doi:10.3390/microorganisms12020328), 2024-02-04
Supplement: s1 [file s1]

## Supplementary data

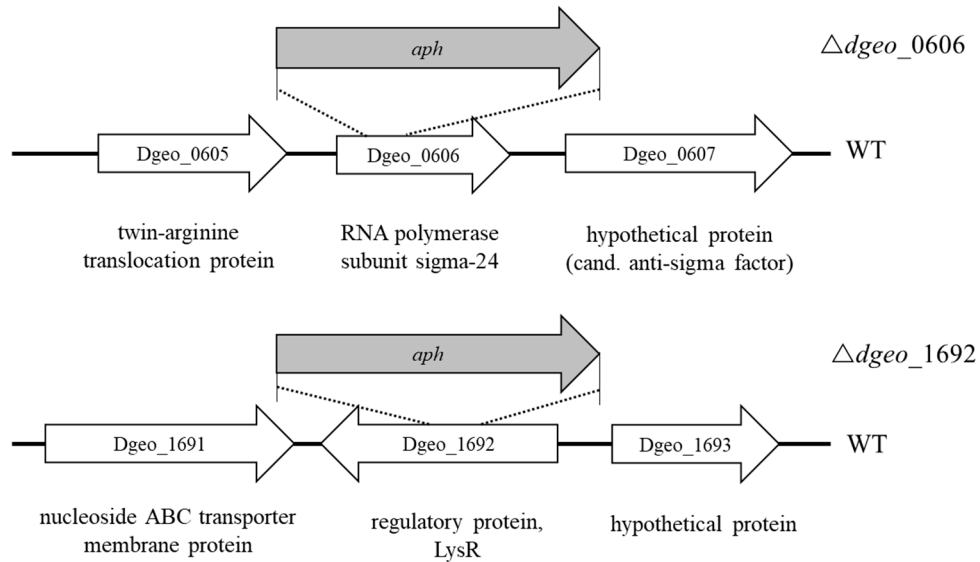

**Figure S1.** Scheme for construction of the  $\Delta dgeo\_0606$  and  $\Delta dgeo\_1692$  mutants by homologous recombination using kanamycin-resistant selection using pKATAph vector which was explained in materials and methods. *aph* is a kanamycin-resistant gene.

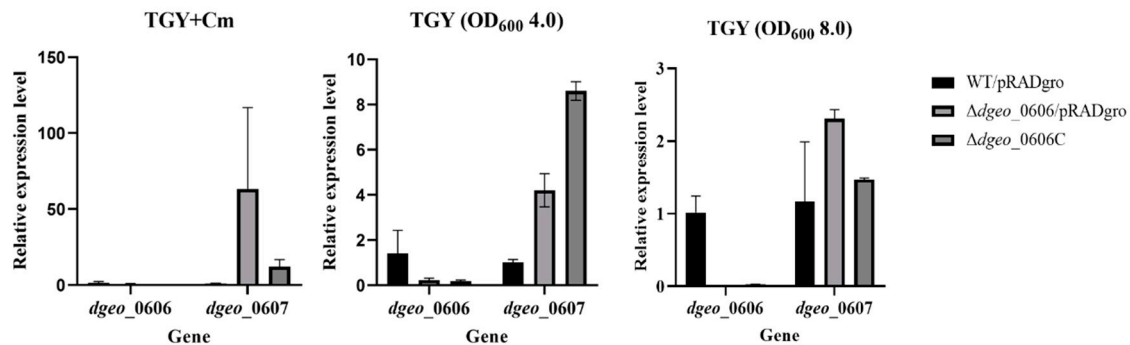

**Figure S2.** Expression levels of *dgeo\_0606* and *dgeo\_0607* by qRT-PCR at different growth condition (chloramphenicol present or absent) and phases (OD<sub>600</sub> of 4.0 or 8.0). Chloramphenicol was added with 3  $\mu$ g/mL. The relative expression levels were normalized to 1.0 of *dgeo\_0606* expression level in WT/pRADgro strain.

**A**

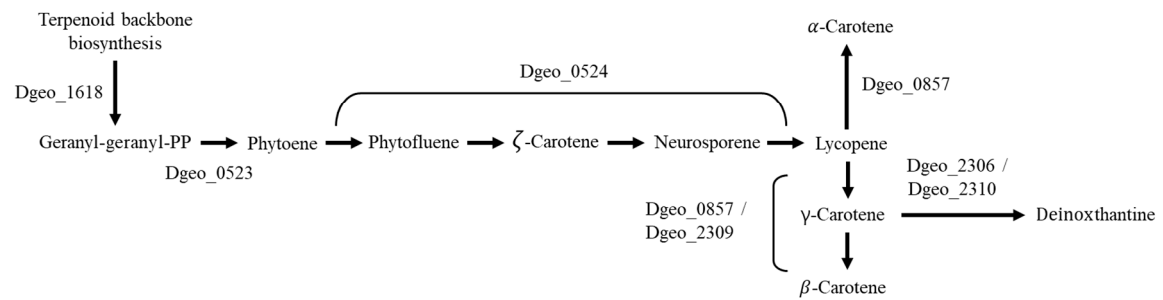

**B**

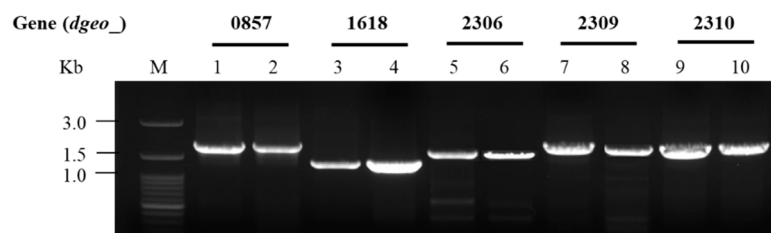

**Figure S3.** (A) Scheme of carotenoid biosynthesis pathway in *D. geothermalis*. (B) PCR detection of five carotenoid pathway involved genes (except *dgeo\_0523* and *dgeo\_0524*) for IS transposition in  $\Delta dgeo_1692hw$ .

**Table S1.** Analysis of specific IS type inserted in transposition loci of IS in  $\Delta dgeo\_0606gw$  and  $\Delta dgeo\_1692gw$  mutants under gamma irradiation.

| Strain              | Non-Pigments   | OD <sub>600</sub> | Gamma-Radiation | Transposase Type       | Direction | Loci                                      |
|---------------------|----------------|-------------------|-----------------|------------------------|-----------|-------------------------------------------|
| $\Delta dgeo\_0606$ | <i>gw1/6/8</i> | 4.0               | 5 kGy           | IS5 family<br>ISDge6   | –         | 8 <sup>th</sup> of<br><i>dgeo_0524</i>    |
| $\Delta dgeo\_0606$ | <i>gw4</i>     | 4.0               | 5 kGy           | IS5 family<br>ISDge6   | +         | 319 <sup>th</sup> of<br><i>dgeo_0524</i>  |
| $\Delta dgeo\_0606$ | <i>gw3/9</i>   | 2.0               | 5 kGy           | IS1 family<br>ISDge2   | –         | 1289 <sup>th</sup> of<br><i>dgeo_0524</i> |
| $\Delta dgeo\_1692$ | <i>gw1</i>     | 4.0               | 5 kGy           | IS5 family<br>ISDge7   | –         | 1673 <sup>rd</sup> of<br><i>dgeo_0524</i> |
| $\Delta dgeo\_1692$ | <i>gw2</i>     | 4.0               | 5 kGy           | IS701 family<br>ISDge5 | +         | 612 <sup>nd</sup> of<br><i>dgeo_0524</i>  |

**Table S2.** Analysis of specific IS type inserted in transposition loci of IS in *WThw* and  $\Delta dgeo\_0606hw$  mutant under hydrogen peroxide treatment.

| Strain              | Non-Pigments | OD <sub>600</sub> | H <sub>2</sub> O <sub>2</sub> (mM) | Transposase Type       | Direction | Loci                                      |
|---------------------|--------------|-------------------|------------------------------------|------------------------|-----------|-------------------------------------------|
| WT                  | <i>hw1/2</i> | 2.0               | 80                                 | IS5 family<br>ISDge6   | –         | 8 <sup>th</sup> of<br><i>dgeo_0524</i>    |
| $\Delta dgeo\_0606$ | <i>hw1</i>   | 2.0               | 80                                 | IS5 family<br>ISDge6   | +         | 723 <sup>rd</sup> of<br><i>dgeo_0524</i>  |
| $\Delta dgeo\_0606$ | <i>hw2</i>   | 2.0               | 100                                | IS5 family<br>ISDge7   | –         | 1403 <sup>rd</sup> of<br><i>dgeo_0524</i> |
| $\Delta dgeo\_0606$ | <i>hw3</i>   | 2.0               | 100                                | IS701 family<br>ISDge5 | –         | 1450 <sup>th</sup> of<br><i>dgeo_0524</i> |
